# Supplementary material for: Peer-mediated HIV assisted partner services to identify and link to care HIV-positive and HCV-positive people who inject drugs: a cohort study protocol
Source: PubMed Central journal article supplement — BMJ Open. 2021 Apr 24;11(4):e041083. doi: 10.1136/bmjopen-2020-041083 (PMC8074565; doi:10.1136/bmjopen-2020-041083), 2021-04-24
Supplement: bmjopen-2020-041083supp001.pdf [file bmjopen-2020-041083supp001.pdf]

## APPENDIX A: PEER EDUCATOR INTRODUCTION SCRIPT

Hello, I am \_\_\_\_\_, a Peer Educator from \_\_\_\_\_. Am I speaking with Ms/Mr. \_\_\_\_\_? I want to be sure I have the right person in front of me. I work at the clinic and have come to talk with you about a health matter that concerns you. This is confidential information for you. Is this a good time to talk? This will not take long and I assure you that our discussion will be confidential.

The information I have concerns your health but it does not mean that something is wrong with your health. We have reason to believe that you may have a health problem, and that you may also be eligible for a research study. You will have to come to the clinic to get more information about both your health issue and the research study. If you agree, you can come to the clinic with me now and I will bring you to the clinician.

Do you have any questions about what I have said so far?

If you do not want to come to the clinic, I will return to find you again tomorrow with someone from the clinic who can talk to you about the health issue.

Have you made a decision about whether you'd like to come with me?

If yes, I will take you to [name of closest clinic] center for further discussions with the clinician at the clinic. If no, we will come back and find you again at a later date to discuss this issue with you further.

Thank you.
