# Supplementary material for: Peer-mediated HIV assisted partner services to identify and link to care HIV-positive and HCV-positive people who inject drugs: a cohort study protocol
Source: PubMed Central journal article supplement — BMJ Open. 2021 Apr 24;11(4):e041083. doi: 10.1136/bmjopen-2020-041083 (PMC8074565; doi:10.1136/bmjopen-2020-041083), 2021-04-24
Supplement: bmjopen-2020-041083supp002.pdf [file bmjopen-2020-041083supp002.pdf]

## APPENDIX B: HEALTH ADVISOR INTRODUCTION SCRIPT

Hello, I am \_\_\_\_\_, a Health Advisor from the Kenya Ministry of Health. Am I speaking with Ms/Mr. \_\_\_\_\_? I want to be sure I have the right person in front of me. I work at the clinic and have come to talk with you about a health matter that concerns you. This is confidential information for you. Is this a good time to talk? This will not take long and I assure you that our discussion will be confidential.

The information I have concerns your health but it does not mean that something is wrong with your health.

I wish to inform you that you may have been exposed to HIV infection. I do not know who gave me information on your exposure to HIV infection.

This does not mean you are infected. It just means that you have been exposed to HIV and will need to test yourself soon to see what your HIV status is.

This HIV test will help you to know your status early and if you are not infected, you can plan to avoid future infections. If you are infected, you will receive advice on how to live positively.

You can do your test anywhere you choose, but it is advisable that you do it as soon as possible.

Do you have any questions about what I have said so far?

If you choose to do your HIV test now, I will do it for you free of charge, but before doing it, I will give you more information on voluntary counseling and testing for HIV.

If you want to do it later, I will give you more information on health facilities where you can go and do your test.

I will be in touch with you for any assistance which you made need. Would you like to have my telephone number? Would you like me to call you?

I have this information for you and would like you to read it carefully and discuss it with me. If it is ok with you, please sign it. I will keep it confidential. You do not have to sign it if you do not want to.

Have you made a decision to do the test? When and where will you like to do it?

Would you like for us to test you?

If yes, would you like to come to the [name of closest clinic] center for testing or where would you want us to offer the test for you? If at home or work, please arrange for a private place where we can offer the service. If no, we would still encourage you to seek services at [name of nearest clinic].

Thank you.
